# Supplementary material
Source: publisher site journal article supplement (https://www.dovepress.com/article/601412)
Supplement: Supplementary file 1 [file 601412%20Supplementary%20Material.docx]

Supplementary Table S1. Baseline characteristics according to FIB-4 category

| **Characteristic** | **Overall** | **Low FIB-4** | **Intermediate FIB-4** | **High FIB-4** | **P value** |
| --- | --- | --- | --- | --- | --- |
| N | 448 | 118 | 234 | 96 |  |
| Age, years | 72.0 [66.0, 79.0] | 66.0 [62.0, 73.0] | 71.5 [67.0, 77.0] | 79.0 [73.8, 84.0] | <0.001 |
| Female sex | 199 (44.4) | 50 (42.4) | 104 (44.4) | 45 (46.9) | 0.805 |
| Hypertension | 298 (66.5) | 78 (66.1) | 159 (67.9) | 61 (63.5) | 0.739 |
| Diabetes mellitus | 139 (31.0) | 38 (32.2) | 72 (30.8) | 29 (30.2) | 0.945 |
| Hyperlipidemia | 191 (42.6) | 51 (43.2) | 100 (42.7) | 40 (41.7) | 0.973 |
| Coronary artery disease | 120 (26.8) | 23 (19.5) | 65 (27.8) | 32 (33.3) | 0.067 |
| Atrial fibrillation | 124 (27.7) | 21 (17.8) | 60 (25.6) | 43 (44.8) | <0.001 |
| Smoking history | 130 (29.0) | 31 (26.3) | 76 (32.5) | 23 (24.0) | 0.225 |
| Prior stroke | 72 (16.1) | 19 (16.1) | 37 (15.8) | 16 (16.7) | 0.982 |
| Antihypertensive therapy | 239 (53.3) | 58 (49.2) | 133 (56.8) | 48 (50.0) | 0.299 |
| Antidiabetic therapy | 107 (23.9) | 28 (23.7) | 57 (24.4) | 22 (22.9) | 0.961 |
| Lipid-lowering therapy | 168 (37.5) | 43 (36.4) | 87 (37.2) | 38 (39.6) | 0.885 |
| Anticoagulant therapy | 42 (9.4) | 5 (4.2) | 21 (9.0) | 16 (16.7) | 0.008 |
| Antiplatelet therapy | 83 (18.5) | 18 (15.3) | 43 (18.4) | 22 (22.9) | 0.356 |
| NIHSS score | 15.0 [9.0, 20.0] | 13.0 [6.2, 18.0] | 15.0 [9.0, 21.0] | 18.0 [12.8, 25.0] | <0.001 |
| ASPECTS | 8.0 [7.0, 9.0] | 9.0 [8.0, 9.0] | 8.0 [7.0, 9.0] | 8.0 [7.0, 9.0] | 0.005 |
| Occlusion site: ICA | 252 (56.2) | 69 (58.5) | 126 (53.8) | 57 (59.4) | 0.687 |
| Occlusion site: M1 | 132 (29.5) | 36 (30.5) | 71 (30.3) | 25 (26.0) |  |
| Occlusion site: M2 | 64 (14.3) | 13 (11.0) | 37 (15.8) | 14 (14.6) |  |
| TOAST classification: CE | 159 (35.5) | 31 (26.3) | 82 (35.0) | 46 (47.9) | 0.015 |
| TOAST classification: LAA | 275 (61.4) | 83 (70.3) | 143 (61.1) | 49 (51.0) |  |
| TOAST classification: Others | 14 (3.1) | 4 (3.4) | 9 (3.8) | 1 (1.0) |  |
| First-line thrombectomy technique: None | 32 (7.1) | 12 (10.2) | 12 (5.1) | 8 (8.3) | 0.066 |
| First-line thrombectomy technique: Aspiration | 91 (20.3) | 18 (15.3) | 50 (21.4) | 23 (24.0) |  |
| First-line thrombectomy technique: Stent | 109 (24.3) | 21 (17.8) | 67 (28.6) | 21 (21.9) |  |
| First-line thrombectomy technique: Combined | 216 (48.2) | 67 (56.8) | 105 (44.9) | 44 (45.8) |  |
| Successful reperfusion, mTICI 2b-3 | 408 (91.1) | 110 (93.2) | 214 (91.5) | 84 (87.5) | 0.330 |
| Symptomatic intracranial hemorrhage | 55 (12.3) | 11 (9.3) | 35 (15.0) | 9 (9.4) | 0.195 |
| Malignant cerebral edema | 78 (17.4) | 11 (9.3) | 46 (19.7) | 21 (21.9) | 0.023 |
| CRP, mg/L | 2.0 [1.0, 7.9] | 2.0 [0.5, 5.8] | 2.0 [0.8, 5.0] | 5.0 [1.4, 19.7] | <0.001 |
| CRP ≥5 mg/L | 152 (33.9) | 34 (28.8) | 65 (27.8) | 53 (55.2) | <0.001 |
| Troponin trajectory: No injury | 255 (56.9) | 89 (75.4) | 131 (56.0) | 35 (36.5) | <0.001 |
| Troponin trajectory: Non-dynamic | 35 (7.8) | 8 (6.8) | 18 (7.7) | 9 (9.4) |  |
| Troponin trajectory: Dynamic | 158 (35.3) | 21 (17.8) | 85 (36.3) | 52 (54.2) |  |

Note: Data are presented as median [interquartile range] or n (%). Comparisons across FIB-4 categories were performed using the Kruskal–Wallis test for continuous variables and the chi-square test or Fisher’s exact test for categorical variables, as appropriate. Percentages were calculated within each FIB-4 category.

Abbreviations: NIHSS, National Institutes of Health Stroke Scale; ASPECTS, Alberta Stroke Program Early CT Score; ICA, internal carotid artery; M1, middle cerebral artery M1 segment; M2, middle cerebral artery M2 segment; TOAST, Trial of Org 10172 in Acute Stroke Treatment; CE, cardioembolism; LAA, large-artery atherosclerosis; mTICI, modified Thrombolysis in Cerebral Infarction; FIB-4, Fibrosis-4 index; CRP, C-reactive protein.

## Supplementary Table S2. Post hoc pairwise comparisons according to troponin trajectory

| **Characteristic** | **Variable type** | **Pairwise comparison** | **Raw P value** | **Bonferroni-adjusted P value** |
| --- | --- | --- | --- | --- |
| Age, years | Continuous | No injury vs Non-dynamic | 0.072 | 0.215 |
| Age, years | Continuous | No injury vs Dynamic | <0.001 | <0.001 |
| Age, years | Continuous | Non-dynamic vs Dynamic | 0.113 | 0.340 |
| NIHSS score | Continuous | No injury vs Non-dynamic | 0.020 | 0.060 |
| NIHSS score | Continuous | No injury vs Dynamic | <0.001 | <0.001 |
| NIHSS score | Continuous | Non-dynamic vs Dynamic | 0.049 | 0.147 |
| ASPECTS | Continuous | No injury vs Non-dynamic | 0.086 | 0.259 |
| ASPECTS | Continuous | No injury vs Dynamic | <0.001 | <0.001 |
| ASPECTS | Continuous | Non-dynamic vs Dynamic | 0.390 | 1.000 |
| FIB-4 | Continuous | No injury vs Non-dynamic | 0.069 | 0.206 |
| FIB-4 | Continuous | No injury vs Dynamic | <0.001 | <0.001 |
| FIB-4 | Continuous | Non-dynamic vs Dynamic | 0.410 | 1.000 |
| CRP, mg/L | Continuous | No injury vs Non-dynamic | 0.021 | 0.062 |
| CRP, mg/L | Continuous | No injury vs Dynamic | <0.001 | <0.001 |
| CRP, mg/L | Continuous | Non-dynamic vs Dynamic | 0.928 | 1.000 |
| Female sex | Categorical | No injury vs Non-dynamic | 0.777 | 1.000 |
| Female sex | Categorical | No injury vs Dynamic | 0.186 | 0.558 |
| Female sex | Categorical | Non-dynamic vs Dynamic | 0.891 | 1.000 |
| Hypertension | Categorical | No injury vs Non-dynamic | 0.345 | 1.000 |
| Hypertension | Categorical | No injury vs Dynamic | 0.018 | 0.054 |
| Hypertension | Categorical | Non-dynamic vs Dynamic | 0.977 | 1.000 |
| Diabetes mellitus | Categorical | No injury vs Non-dynamic | 0.288 | 0.864 |
| Diabetes mellitus | Categorical | No injury vs Dynamic | <0.001 | 0.001 |
| Diabetes mellitus | Categorical | Non-dynamic vs Dynamic | 0.577 | 1.000 |
| Hyperlipidemia | Categorical | No injury vs Non-dynamic | 0.567 | 1.000 |
| Hyperlipidemia | Categorical | No injury vs Dynamic | 0.005 | 0.016 |
| Hyperlipidemia | Categorical | Non-dynamic vs Dynamic | 0.038 | 0.114 |
| Coronary artery disease | Categorical | No injury vs Non-dynamic | 0.165 | 0.496 |
| Coronary artery disease | Categorical | No injury vs Dynamic | <0.001 | <0.001 |
| Coronary artery disease | Categorical | Non-dynamic vs Dynamic | 0.643 | 1.000 |
| Atrial fibrillation | Categorical | No injury vs Non-dynamic | 0.983 | 1.000 |
| Atrial fibrillation | Categorical | No injury vs Dynamic | 0.032 | 0.095 |
| Atrial fibrillation | Categorical | Non-dynamic vs Dynamic | 0.443 | 1.000 |
| Smoking history | Categorical | No injury vs Non-dynamic | 0.148 | 0.445 |
| Smoking history | Categorical | No injury vs Dynamic | 0.836 | 1.000 |
| Smoking history | Categorical | Non-dynamic vs Dynamic | 0.217 | 0.652 |
| Prior stroke | Categorical | No injury vs Non-dynamic | 0.408 | 1.000 |
| Prior stroke | Categorical | No injury vs Dynamic | 1.000 | 1.000 |
| Prior stroke | Categorical | Non-dynamic vs Dynamic | 0.394 | 1.000 |
| Antihypertensive therapy | Categorical | No injury vs Non-dynamic | 0.279 | 0.838 |
| Antihypertensive therapy | Categorical | No injury vs Dynamic | 0.041 | 0.122 |
| Antihypertensive therapy | Categorical | Non-dynamic vs Dynamic | 1.000 | 1.000 |
| Antidiabetic therapy | Categorical | No injury vs Non-dynamic | 0.777 | 1.000 |
| Antidiabetic therapy | Categorical | No injury vs Dynamic | 0.340 | 1.000 |
| Antidiabetic therapy | Categorical | Non-dynamic vs Dynamic | 1.000 | 1.000 |
| Lipid-lowering therapy | Categorical | No injury vs Non-dynamic | 0.888 | 1.000 |
| Lipid-lowering therapy | Categorical | No injury vs Dynamic | <0.001 | 0.001 |
| Lipid-lowering therapy | Categorical | Non-dynamic vs Dynamic | 0.041 | 0.122 |
| Anticoagulant therapy | Categorical | No injury vs Non-dynamic | 0.750 | 1.000 |
| Anticoagulant therapy | Categorical | No injury vs Dynamic | 0.682 | 1.000 |
| Anticoagulant therapy | Categorical | Non-dynamic vs Dynamic | 0.535 | 1.000 |
| Antiplatelet therapy | Categorical | No injury vs Non-dynamic | 0.127 | 0.380 |
| Antiplatelet therapy | Categorical | No injury vs Dynamic | 0.015 | 0.046 |
| Antiplatelet therapy | Categorical | Non-dynamic vs Dynamic | 1.000 | 1.000 |
| Occlusion site | Categorical | No injury vs Non-dynamic | 0.993 | 1.000 |
| Occlusion site | Categorical | No injury vs Dynamic | 0.986 | 1.000 |
| Occlusion site | Categorical | Non-dynamic vs Dynamic | 1.000 | 1.000 |
| TOAST classification | Categorical | No injury vs Non-dynamic | 0.884 | 1.000 |
| TOAST classification | Categorical | No injury vs Dynamic | <0.001 | <0.001 |
| TOAST classification | Categorical | Non-dynamic vs Dynamic | 0.149 | 0.447 |
| First-line thrombectomy technique | Categorical | No injury vs Non-dynamic | 0.514 | 1.000 |
| First-line thrombectomy technique | Categorical | No injury vs Dynamic | 0.543 | 1.000 |
| First-line thrombectomy technique | Categorical | Non-dynamic vs Dynamic | 0.310 | 0.931 |
| Successful reperfusion, mTICI 2b–3 | Categorical | No injury vs Non-dynamic | 0.015 | 0.046 |
| Successful reperfusion, mTICI 2b–3 | Categorical | No injury vs Dynamic | 0.283 | 0.849 |
| Successful reperfusion, mTICI 2b–3 | Categorical | Non-dynamic vs Dynamic | 0.144 | 0.433 |
| Symptomatic intracranial hemorrhage | Categorical | No injury vs Non-dynamic | 0.077 | 0.231 |
| Symptomatic intracranial hemorrhage | Categorical | No injury vs Dynamic | <0.001 | <0.001 |
| Symptomatic intracranial hemorrhage | Categorical | Non-dynamic vs Dynamic | 0.419 | 1.000 |
| Malignant cerebral edema | Categorical | No injury vs Non-dynamic | 0.069 | 0.206 |
| Malignant cerebral edema | Categorical | No injury vs Dynamic | <0.001 | <0.001 |
| Malignant cerebral edema | Categorical | Non-dynamic vs Dynamic | 0.306 | 0.918 |
| FIB-4 category | Categorical | No injury vs Non-dynamic | 0.119 | 0.358 |
| FIB-4 category | Categorical | No injury vs Dynamic | <0.001 | <0.001 |
| FIB-4 category | Categorical | Non-dynamic vs Dynamic | 0.326 | 0.977 |
| CRP ≥5 mg/L | Categorical | No injury vs Non-dynamic | <0.001 | <0.001 |
| CRP ≥5 mg/L | Categorical | No injury vs Dynamic | <0.001 | <0.001 |
| CRP ≥5 mg/L | Categorical | Non-dynamic vs Dynamic | 1.000 | 1.000 |

## **Note: Pairwise comparisons were performed across troponin trajectory groups. Continuous variables were compared using Wilcoxon rank-sum tests, and categorical variables were compared using chi-square or Fisher’s exact tests, as appropriate. P values were adjusted using Bonferroni correction for multiple comparisons. Troponin trajectory groups were defined as no myocardial injury, non-dynamic myocardial injury, and dynamic myocardial injury.**

## Supplementary Table S3. Post hoc pairwise comparisons according to FIB-4 category

| **Characteristic** | **Variable type** | **Pairwise comparison** | **Raw P value** | **Bonferroni-adjusted P value** |
| --- | --- | --- | --- | --- |
| Age, years | Continuous | Low vs Intermediate | <0.001 | <0.001 |
| Age, years | Continuous | Low vs High | <0.001 | <0.001 |
| Age, years | Continuous | Intermediate vs High | <0.001 | <0.001 |
| NIHSS score | Continuous | Low vs Intermediate | 0.034 | 0.102 |
| NIHSS score | Continuous | Low vs High | <0.001 | <0.001 |
| NIHSS score | Continuous | Intermediate vs High | 0.002 | 0.007 |
| ASPECTS | Continuous | Low vs Intermediate | 0.156 | 0.467 |
| ASPECTS | Continuous | Low vs High | 0.001 | 0.003 |
| ASPECTS | Continuous | Intermediate vs High | 0.020 | 0.059 |
| CRP, mg/L | Continuous | Low vs Intermediate | 0.491 | 1.000 |
| CRP, mg/L | Continuous | Low vs High | <0.001 | <0.001 |
| CRP, mg/L | Continuous | Intermediate vs High | <0.001 | <0.001 |
| Female sex | Categorical | Low vs Intermediate | 0.798 | 1.000 |
| Female sex | Categorical | Low vs High | 0.602 | 1.000 |
| Female sex | Categorical | Intermediate vs High | 0.779 | 1.000 |
| Hypertension | Categorical | Low vs Intermediate | 0.819 | 1.000 |
| Hypertension | Categorical | Low vs High | 0.805 | 1.000 |
| Hypertension | Categorical | Intermediate vs High | 0.520 | 1.000 |
| Diabetes mellitus | Categorical | Low vs Intermediate | 0.879 | 1.000 |
| Diabetes mellitus | Categorical | Low vs High | 0.869 | 1.000 |
| Diabetes mellitus | Categorical | Intermediate vs High | 1.000 | 1.000 |
| Hyperlipidemia | Categorical | Low vs Intermediate | 1.000 | 1.000 |
| Hyperlipidemia | Categorical | Low vs High | 0.929 | 1.000 |
| Hyperlipidemia | Categorical | Intermediate vs High | 0.956 | 1.000 |
| Coronary artery disease | Categorical | Low vs Intermediate | 0.118 | 0.353 |
| Coronary artery disease | Categorical | Low vs High | 0.032 | 0.095 |
| Coronary artery disease | Categorical | Intermediate vs High | 0.383 | 1.000 |
| Atrial fibrillation | Categorical | Low vs Intermediate | 0.129 | 0.388 |
| Atrial fibrillation | Categorical | Low vs High | <0.001 | <0.001 |
| Atrial fibrillation | Categorical | Intermediate vs High | 0.001 | 0.003 |
| Smoking history | Categorical | Low vs Intermediate | 0.283 | 0.850 |
| Smoking history | Categorical | Low vs High | 0.819 | 1.000 |
| Smoking history | Categorical | Intermediate vs High | 0.161 | 0.483 |
| Prior stroke | Categorical | Low vs Intermediate | 1.000 | 1.000 |
| Prior stroke | Categorical | Low vs High | 1.000 | 1.000 |
| Prior stroke | Categorical | Intermediate vs High | 0.978 | 1.000 |
| Antihypertensive therapy | Categorical | Low vs Intermediate | 0.210 | 0.631 |
| Antihypertensive therapy | Categorical | Low vs High | 1.000 | 1.000 |
| Antihypertensive therapy | Categorical | Intermediate vs High | 0.312 | 0.935 |
| Antidiabetic therapy | Categorical | Low vs Intermediate | 1.000 | 1.000 |
| Antidiabetic therapy | Categorical | Low vs High | 1.000 | 1.000 |
| Antidiabetic therapy | Categorical | Intermediate vs High | 0.891 | 1.000 |
| Lipid-lowering therapy | Categorical | Low vs Intermediate | 0.985 | 1.000 |
| Lipid-lowering therapy | Categorical | Low vs High | 0.742 | 1.000 |
| Lipid-lowering therapy | Categorical | Intermediate vs High | 0.776 | 1.000 |
| Anticoagulant therapy | Categorical | Low vs Intermediate | 0.165 | 0.495 |
| Anticoagulant therapy | Categorical | Low vs High | 0.005 | 0.015 |
| Anticoagulant therapy | Categorical | Intermediate vs High | 0.069 | 0.207 |
| Antiplatelet therapy | Categorical | Low vs Intermediate | 0.561 | 1.000 |
| Antiplatelet therapy | Categorical | Low vs High | 0.210 | 0.630 |
| Antiplatelet therapy | Categorical | Intermediate vs High | 0.430 | 1.000 |
| Occlusion site | Categorical | Low vs Intermediate | 0.455 | 1.000 |
| Occlusion site | Categorical | Low vs High | 0.634 | 1.000 |
| Occlusion site | Categorical | Intermediate vs High | 0.646 | 1.000 |
| TOAST classification | Categorical | Low vs Intermediate | 0.230 | 0.690 |
| TOAST classification | Categorical | Low vs High | 0.003 | 0.008 |
| TOAST classification | Categorical | Intermediate vs High | 0.062 | 0.185 |
| First-line thrombectomy technique | Categorical | Low vs Intermediate | 0.015 | 0.046 |
| First-line thrombectomy technique | Categorical | Low vs High | 0.266 | 0.799 |
| First-line thrombectomy technique | Categorical | Intermediate vs High | 0.468 | 1.000 |
| Successful reperfusion, mTICI 2b–3 | Categorical | Low vs Intermediate | 0.711 | 1.000 |
| Successful reperfusion, mTICI 2b–3 | Categorical | Low vs High | 0.233 | 0.698 |
| Successful reperfusion, mTICI 2b–3 | Categorical | Intermediate vs High | 0.370 | 1.000 |
| Symptomatic intracranial hemorrhage | Categorical | Low vs Intermediate | 0.189 | 0.567 |
| Symptomatic intracranial hemorrhage | Categorical | Low vs High | 1.000 | 1.000 |
| Symptomatic intracranial hemorrhage | Categorical | Intermediate vs High | 0.239 | 0.718 |
| Malignant cerebral edema | Categorical | Low vs Intermediate | 0.020 | 0.059 |
| Malignant cerebral edema | Categorical | Low vs High | 0.018 | 0.054 |
| Malignant cerebral edema | Categorical | Intermediate vs High | 0.761 | 1.000 |
| CRP ≥5 mg/L | Categorical | Low vs Intermediate | 0.937 | 1.000 |
| CRP ≥5 mg/L | Categorical | Low vs High | <0.001 | <0.001 |
| CRP ≥5 mg/L | Categorical | Intermediate vs High | <0.001 | <0.001 |
| Troponin trajectory | Categorical | Low vs Intermediate | 0.001 | 0.003 |
| Troponin trajectory | Categorical | Low vs High | <0.001 | <0.001 |
| Troponin trajectory | Categorical | Intermediate vs High | 0.005 | 0.015 |

**Note: Pairwise comparisons were performed across FIB-4 categories. Continuous variables were compared using Wilcoxon rank-sum tests, and categorical variables were compared using chi-square or Fisher’s exact tests, as appropriate. P values were adjusted using Bonferroni correction for multiple comparisons. FIB-4 categories were defined as low (<1.30), intermediate (1.30–2.67), and high (>2.67).**

Supplementary Table S4. Association between high FIB-4 and troponin trajectory across comorbidity and medication subgroups

| ****Subgroup**** | ****Level**** | ****N**** | ****Troponin trajectory,** No / Non-dynamic / Dynamic** | ****FIB-4 category,** Low-Intermediate / High** | ****aOR****  ****(95% CI)**** | ****P**** | ****P for interaction**** |
| --- | --- | --- | --- | --- | --- | --- | --- |
| Hypertension | No | 150 | 98 / 10 / 42 | 115 / 35 | 1.90 (0.78–4.62) | 0.157 | 0.420 |
|  | Yes | 298 | 157 / 25 / 116 | 237 / 61 | 1.64 (0.89–3.03) | 0.110 |  |
| Diabetes mellitus | No | 309 | 193 / 23 / 93 | 242 / 67 | 1.07 (0.58–1.98) | 0.821 | 0.052 |
|  | Yes | 139 | 62 / 12 / 65 | 110 / 29 | 4.68 (1.71–12.78) | 0.003 |  |
| Hyperlipidemia | No | 257 | 158 / 24 / 75 | 201 / 56 | 1.13 (0.57–2.22) | 0.727 | 0.045 |
|  | Yes | 191 | 97 / 11 / 83 | 151 / 40 | 3.05 (1.37–6.79) | 0.006 |  |
| Coronary artery disease | No | 328 | 205 / 24 / 99 | 264 / 64 | 1.17 (0.63–2.16) | 0.615 | 0.028 |
|  | Yes | 120 | 50 / 11 / 59 | 88 / 32 | 5.11 (1.82–14.33) | 0.002 |  |
| Atrial fibrillation | No | 324 | 194 / 26 / 104 | 271 / 53 | 1.72 (0.91–3.25) | 0.097 | 0.650 |
|  | Yes | 124 | 61 / 9 / 54 | 81 / 43 | 1.85 (0.80–4.26) | 0.149 |  |
| Prior stroke | No | 376 | 215 / 27 / 134 | 296 / 80 | 1.62 (0.94–2.82) | 0.085 | 0.993 |
|  | Yes | 72 | 40 / 8 / 24 | 56 / 16 | 1.98 (0.60–6.52) | 0.263 |  |
| Antihypertensive therapy | No | 209 | 131 / 14 / 64 | 161 / 48 | 1.70 (0.82–3.51) | 0.151 | 0.719 |
|  | Yes | 239 | 124 / 21 / 94 | 191 / 48 | 1.78 (0.89–3.58) | 0.105 |  |
| Antidiabetic therapy | No | 341 | 199 / 26 / 116 | 267 / 74 | 1.16 (0.65–2.06) | 0.625 | 0.025 |
|  | Yes | 107 | 56 / 9 / 42 | 85 / 22 | 5.57 (1.75–17.72) | 0.004 |  |
| Lipid-lowering therapy | No | 280 | 175 / 25 / 80 | 222 / 58 | 1.11 (0.58–2.13) | 0.750 | 0.029 |
|  | Yes | 168 | 80 / 10 / 78 | 130 / 38 | 3.50 (1.44–8.55) | 0.006 |  |
| Anticoagulant therapy | No | 406 | 232 / 33 / 141 | 326 / 80 | 1.71 (0.99–2.93) | 0.053 | 0.566 |
|  | Yes | 42 | 23 / 2 / 17 | 26 / 16 | 2.53 (0.45–14.14) | 0.292 |  |
| Antiplatelet therapy | No | 365 | 219 / 26 / 120 | 291 / 74 | 1.27 (0.72–2.25) | 0.412 | 0.037 |
|  | Yes | 83 | 36 / 9 / 38 | 61 / 22 | 7.00 (1.95–25.18) | 0.003 |  |

Note: Odds ratios were estimated using ordinal logistic regression, with troponin trajectory as the ordinal outcome and high FIB-4 as the exposure. High FIB-4 was compared with low/intermediate FIB-4. Subgroup-specific models were adjusted for age, sex, and NIHSS score using a parsimonious adjustment strategy because of limited subgroup sample sizes and sparse outcome distributions. P values for interaction were calculated using likelihood ratio tests comparing models with and without the multiplicative interaction term between high FIB-4 and the subgroup variable, with adjustment for age, sex, and NIHSS score.

Supplementary Table S5. Crude association between high FIB-4 and 90-day mortality stratified by troponin trajectory

| ****Subgroup**** | ****Deaths / Total****  ****(%)**** | ****Low/intermediate FIB-4 deaths / total**** | ****High FIB-4 deaths / total**** | ****Crude OR (95% CI)**** | ****P value**** |
| --- | --- | --- | --- | --- | --- |
| Overall cohort | 67/448 (15.0%) | 34/352 | 33/96 | 4.90 (2.83–8.49) | <0.001 |
| No injury | 13/255 (5.1%) | 10/220 | 3/35 | 1.97 (0.51–7.54) | 0.323 |
| Non-dynamic | 5/35 (14.3%) | 2/26 | 3/9 | 6.00 (0.81–44.35) | 0.079 |
| Dynamic | 49/158 (31.0%) | 22/106 | 27/52 | 4.12 (2.01–8.46) | <0.001 |

Note: Odds ratios were estimated using unadjusted logistic regression models, with 90-day mortality as the outcome and high FIB-4 as the exposure. High FIB-4 was compared with low/intermediate FIB-4. Multivariable adjustment was not performed because of the limited number of deaths and sparse event distributions within some troponin trajectory strata. The P value for interaction was calculated using a crude logistic regression model including the interaction term between FIB-4 category and troponin trajectory. The crude P value for interaction was 0.539.
